# Supplementary material
Source: Springer Nature journal article supplement (https://www.springermedizin.de/resource/supplementary/13034_2012_193_MOESM1_ESM.pdf/9652514)
Supplement: MOESM1 [file 9652514]

## Identity integration vs. Identity diffusion

Scale 1:  
Identity-Continuity vs.  
**Discontinuity**  
Ego-Stability, intuitive-emotional „I“  
(„Changing while staying the same“)

Scale 2:  
Identity-Coherence vs.  
**Incoherence**  
Ego-Strength, defined „ME“  
(„non-fragmented self with clear  
boundaries“)

psychosocial  
functioning

Sub 1.1: **Stability in attributes** /  
goals vs. lack of perspective  
F1: capacity to invest / stabilizing  
commitment to interests, talents,  
perspectives, life goals  
F2: stable inner time-line, historical-  
biographical self, subjective self-  
sameness, sense of continuity  
F3: stabilizing moral guidelines and inner  
rules

Sub 2.1: **Consistent self** image vs.  
contradictions  
F1: same attributes and behaviors with  
different friends or situations,  
consistent appearance  
F2: no extreme subjective  
contradictions / diversity of self-  
pictures, coherent self-concept  
F3: awareness of a defined core and  
inner substance

**self-related**  
intrapersonal  
„Me and I“

Sub 1.2: **Stability in relations** /  
roles vs. lack of affiliation  
F1: capacity to invest / stabilizing  
commitment to lasting relationships  
F2: positive identification with stabilizing  
roles (ethnic - cultural - family self)  
F3: positive body-self

Sub 2.2: **Autonomy** / ego-strength  
vs. over-identification, suggestibility  
F1: assertiveness, ego-strength, no  
over-identification or over-matching  
F2: independent intrinsic self-worth, no  
suggestibility  
F3: autonomous self (affect) regulation

**social-related**  
interpersonal  
„Me and You“

Sub 1.3: Positive **emotional self**  
**reflection** vs. distrust in stability of  
emotions  
F1: understanding own feelings, good  
emotional accessibility  
F2: understanding others' feelings, trust  
in stability of others' feelings

Sub 2.3: positive **cognitive self**  
**reflection** vs. superficial, diffuse  
representations  
F1: understanding motives and  
behavior, good cognitive  
accessibility  
F2: differentiated and coherent mental  
representations

**mental**  
**representations**  
accessability and  
complexity concerning  
own and others'  
emotions / motives
